# Supplementary material for: Effect of VaMyb40 and VaMyb60 Overexpression on Stilbene Biosynthesis in Cell Cultures of Grapevine Vitis amurensis Rupr
Source: MDPI journal article supplement (doi:10.3390/plants11151916), 2022-07-24

**Supplementary Table S1.** List of the stilbenes and anthocyanins derivatives identified in the methanol extracts of *Vitis amurensis* cells.

|                | Rt<br>(min) | Elemental<br>composition | Moll<br>mass<br>(g/M) | MS fragmentation |                      | MS2 fragmentation |                   | UV, λ max<br>(nm) | Assignment                   |
|----------------|-------------|--------------------------|-----------------------|------------------|----------------------|-------------------|-------------------|-------------------|------------------------------|
|                |             |                          |                       | Negative ion mod | Positive ion<br>mode | Negative ion mod  | Positive ion mode |                   |                              |
|                |             |                          |                       | [M-H]- (m/z)     | [M+H]+ (m/z)         | [M-H]- (m/z)      | [M+H]+ (m/z)      |                   |                              |
| Anthocyanins   |             |                          |                       |                  |                      |                   |                   |                   |                              |
| 1 <sup>a</sup> | 13.1        | C27H31O16                | 611.52                | 610              | 611                  | 285               | 287;449           | 516               | Cyanidin-3,5-O-diglucoside   |
| 2              | 14.3        | C21H21O12                | 465.4                 | 463              | 465                  | 301               | 303               | 524               | Delphinidin-3-O-glucoside    |
| 3              | 16.0        | C32H27O13                | 655.6                 | 654              | 655                  | 491;329           | 331;493           | 528               | Malvidin-3,5-O-diglucoside   |
| 4              | 17.4        | C21H21O11+               | 449                   | 447              | 449                  | 284;211           | 287               | 516               | Cyanidin-3-O-glucoside       |
| 5              | 19.2        | C22H23O12+               | 479                   | 478              | 479                  | 314,299           | 317               | 525               | Petunidin-3-galactoside      |
| Stilbenes      |             |                          |                       |                  |                      |                   |                   |                   |                              |
| 1 <sup>a</sup> | 17.1        | C26H32O13                | 552.5                 | 551              | 553                  | 389;227           | 229;241           | 308               | 3,4'-diglucoside resveratrol |
| 2              | 22.8        | C20H22O8                 | 390.388               | 389              | 391                  | 227               | 229               | 310               | <i>trans</i> -piceid         |
| 3              | 23.9        | C20H22O8                 | 390.388               | 389              | 391                  | 227               | 229               | 290               | <i>cis</i> -piceis           |
| 4              | 24.7        | C14H12O4                 | 244.246               | 243              | 245                  | 225;201           | 147;133           | 320               | <i>trans</i> -piceatannol    |
| 5              | 28.9        | C14H12O3                 | 228.25                | 227              | 229                  | 185               | 142; 184; 114     | 310               | <i>trans</i> -resveratrol    |
| 6              | 32.0        | C14H12O3                 | 228.25                | 227              | 229                  | 185               | 142; 184; 114     | 290               | <i>cis</i> -resveratrol      |
| 7              | 35.5        | C28H22O6                 | 454.47                | 453              | 455                  | 359,347           | 349;343           | 320               | <i>trans</i> -ε-Viniferin    |
| 8              | 37.7        | C28H22O6                 | 454.47                | 453              | 455                  | 369;411;435       | 361;437           | 320               | <i>trans</i> -D-Viniferin    |

<sup>a</sup>The peaks are numbered as shown in supplementary **Figure S2** (anthocyanins) and **Figure 2** (stilbenes).



**Supplementary Table S2.** Primers used for amplification of *Vitis amurensis* cDNAs in PCR.

| cDNA                                                                                                                      | Primers names                          | Primers sequences, 5'-3'                                            |
|---------------------------------------------------------------------------------------------------------------------------|----------------------------------------|---------------------------------------------------------------------|
| <b>Primers for obtaining of the full <i>VaMybs</i> cDNA and generation the construction for plant cell transformation</b> |                                        |                                                                     |
| Full <i>VaMyb40</i> cDNA obtaining                                                                                        | VaMyb40-nachS<br>VaMyb40-KonA          | 5'ATGGGAAGACAGCCTTGTG,<br>5'TCAATGGCTATTTTCCAAGA,                   |
| Full <i>VaMyb60</i> cDNA obtaining                                                                                        | VaMyb60-nachS<br>VaMyb60-KonA          | ATGGGAAGGCCTCCTTGCTG,<br>TCAGAATATTGGAGAGAGTT,                      |
| Overexpression of <i>VaMyb40</i>                                                                                          | VaMyb40-Bgl-pSATs<br>VaMyb40-Sal-pSATa | GCTCAGATCTATGGGAAGACAGCCTTGTG,<br>TCGAGTTCGACTCAATGGCTATTTTCCAAGA,  |
| Overexpression of <i>VaMyb60</i>                                                                                          | VaMyb60-Bgl-pSATs<br>VaMyb60-Sal-pSATa | GCTCAGATCTATGGGAAGGCCTCCTTGCTG,<br>TCGAGTTCGACTCAGAATATTGGAGAGAGTT, |
| <b>Primers for real-time PCRs</b>                                                                                         |                                        |                                                                     |
| <i>VaMyb40</i> transgene                                                                                                  | VaMyb40-real-S<br>pSAT-term-A          | ATCCTCATCTCTCCAAGATGAC,<br>GAGAGACTGGTGATTTTTCG,                    |
| <i>VaMyb40</i> endogene                                                                                                   | VaMyb40-real-S<br>VaMyb40endo-real-A   | ATCCTCATCTCTCCAAGATGAC,<br>CACAGAAGGGGAGACAGTATG,                   |
| <i>VaMyb40</i> total                                                                                                      | VaMyb40-real-S<br>VaMyb40-real-A       | ATCCTCATCTCTCCAAGATGAC,<br>TCAATGGCTATTTTCCAAGAAGAAAAG,             |
| <i>VaMyb60</i> transgene                                                                                                  | VaMyb60-real-S<br>pSAT-term-A          | CTCTTGGATGAATCAGCAGC,<br>GAGAGACTGGTGATTTTTCG,                      |
| <i>VaMyb60</i> endogene                                                                                                   | VaMyb60-real-S<br>VaMyb60endo-real-A   | CTCTTGGATGAATCAGCAGC,<br>CTTCTTTTATCATTATATCTCAAGCA,                |
| <i>VaMyb60</i> total                                                                                                      | VaMyb60-real-S<br>VaMyb60-real-A       | CTCTTGGATGAATCAGCAGC,<br>TCAGAATATTGGAGAGAGTTGATC,                  |
| <i>VaPAL1</i><br>(EU659859)                                                                                               | VaPAL1-real-s<br>VaPAL1-real-a         | 5'CAGGACTTCACCTCAATGG,<br>5'GGGTTATCATTAACGGAGTTGA,                 |
| <i>VaPAL2</i><br>(EU659860)                                                                                               | VaPAL2-real-s<br>VaPAL2-real-a         | 5'AAGGACTTCCCCTCAATGG,<br>5'GGGTTATCGTTCAGTGTGA,                    |
| <i>VaPAL3</i><br>(EU659861)                                                                                               | VaPAL3-real-s<br>VaPAL3-real-a         | 5'TCCGAACATCTCCCCAGT,<br>5'ATCAAGGGATTGTCGTTTACC,                   |
| <i>VaPAL4</i><br>(GQ443744)                                                                                               | VaPAL4-real-s<br>VaPAL4-real-a         | 5'AGCAAGATCGGTATGCTCT,<br>5'TCTATGGACTTCGTTGATGT,                   |
| <i>VaPAL5</i><br>(GQ443745)                                                                                               | VaPAL5-real-s<br>VaPAL5-real-a         | 5'GTTGATGAAGCCTAAACAAG,<br>5'CCATGCGAATGACCTCAAT,                   |
| <i>VaCHS1</i><br>(KT589834)                                                                                               | VaCHS-real-s<br>VaCHS-real-a           | 5'AAAGGGCACCACAGGGGAAG,<br>5'TCAGTGAGTCGATTGTGTAGCAAG,              |
| <i>VaSTS1</i><br>(EU659862)                                                                                               | VaSTS1-real-s<br>VaSTS1-real-a         | 5'CCAACCAAAGTCCAAGATCA,<br>5'CCTTCTAACCGATGTTTCAAGA,                |
| <i>VaSTS2</i><br>(EU659863)                                                                                               | VaSTS2-real-s<br>VaSTS2-real-a         | 5'CGGTGCGGATTACAACTC,<br>5'CACCCTTGATGGTACAACAT,                    |
| <i>VaSTS3</i><br>(EU659864)                                                                                               | VaSTS3-real-s<br>VaSTS3-real-a         | 5'GTCAGCCTAAATCGAAGATCAC,<br>5'TCTTCTAACAGATGGTTCGAGG,              |
| <i>VaSTS4</i><br>(EU659865)                                                                                               | VaSTS4-real-s<br>VaSTS4-real-a         | 5'ACAACCTCTGGTGTAGAAAT,<br>5'CTGACCGATGTTTCAAGGC,                   |
| <i>VaSTS5</i><br>(EU659866)                                                                                               | VaSTS5-real-s<br>VaSTS5-real-a         | 5'CCTCGAACCATCTGTTAGAAGA,<br>5'TCTCCGCAAGATCCTTAGC,                 |
| <i>VaSTS6</i><br>(EU659867)                                                                                               | VaSTS6-real-s<br>VaSTS6-real-a         | 5'CCTCAGGTGTAGAAATGCC,<br>5'CATCACTCTTCTAACAGATGG,                  |
| <i>VaSTS7</i><br>(EU659868)                                                                                               | VaSTS7-real-s<br>VaSTS7-real-a         | 5'GCAGCACTGAAGGCACTTAA,<br>5'ATTTCTACACCTGACGTTGT,                  |
| <i>VaSTS8</i><br>(GQ443746)                                                                                               | VaSTS8-real-s<br>VaSTS8-real-a         | 5'GCCTCGAACCATCTGTCA,<br>5'AAGATCCTTAGCTGTTTCA,                     |
| <i>VaSTS9</i><br>(GU266256)                                                                                               | VaSTS9-real-s<br>VaSTS9-real-a         | 5'GGCAGCCTAAGTCCAAGATTA,<br>5'AGTCTGCACCGGGCATTTC,                  |
| <i>VaSTS10</i><br>(JQ780328)                                                                                              | VaSTS10-real-s<br>VaSTS10-real-a       | 5'GCAGGAGCACGGGTTCT,<br>5'AGTCCAAAGCAATTTCAGAA,                     |
| <i>VaActin1</i>                                                                                                           | <i>VaActin</i> -realS                  | 5'GTATTGTGCTGGATTCTGGTGA,                                           |



|                                            |                                                |                                                      |
|--------------------------------------------|------------------------------------------------|------------------------------------------------------|
| (DQ517935)                                 | <i>VaActin</i> -realA                          | 5'GCAAGGTCAAGACGAAGGATAG,                            |
| <i>VaGAPDH</i><br>(AM437491)               | <i>VaGAPDH</i> -realS<br><i>VaGAPDH</i> -realA | 5'CACTGAAGATGATGTTGTTTCC,<br>5'GCTATTCCAGCCTTGGCAT,  |
| <b>Primers for semiquantitative RT-PCR</b> |                                                |                                                      |
| <i>nptII</i> (AY818371)                    | NPTII-SER-S<br>NPTII-KON-A                     | 5'ATTCGACCACCAAGCGAAAC,<br>5'TCAGAAGAAGCTCGTCAAGAA,  |
| <i>VirB2</i> (KY000054)                    | VIRB2-S<br>VIRB2-A                             | 5'ATGCGATGCTTTGAAAGATACCG,<br>5'TTAGCCACCTCCAGTCAGCG |

**Supplementary Table S3.** Comparison of the nucleotide sequences (BLAST) *Vitis amurensis* *VaMyb40* and *VaMyb60* genes with known *VvMyb40* and *VrMyb60* genes from *Vitis vinifera* and *Vitis riparia* respectively. The Genbank accession numbers are given in parentheses.

|                               | <i>VaMyb40</i> | <i>VaMyb60</i> | <i>VvMyb40</i> | <i>VrMyb60</i> |
|-------------------------------|----------------|----------------|----------------|----------------|
| <i>VaMyb40</i>                | -              | 52%            | <b>100%</b>    | 52%            |
| <i>VaMyb60</i>                | 52%            | -              | 52%            | <b>99.2%</b>   |
| <i>VvMyb40</i> (XM_019224778) | <b>100%</b>    | 52%            | -              | 52%            |
| <i>VrMyb60</i> (XM_034837254) | 52%            | <b>99.2%</b>   | 52%            | -              |



**Supplementary Figure S1.** *Vitis amurens* cell lines used in the experiments.

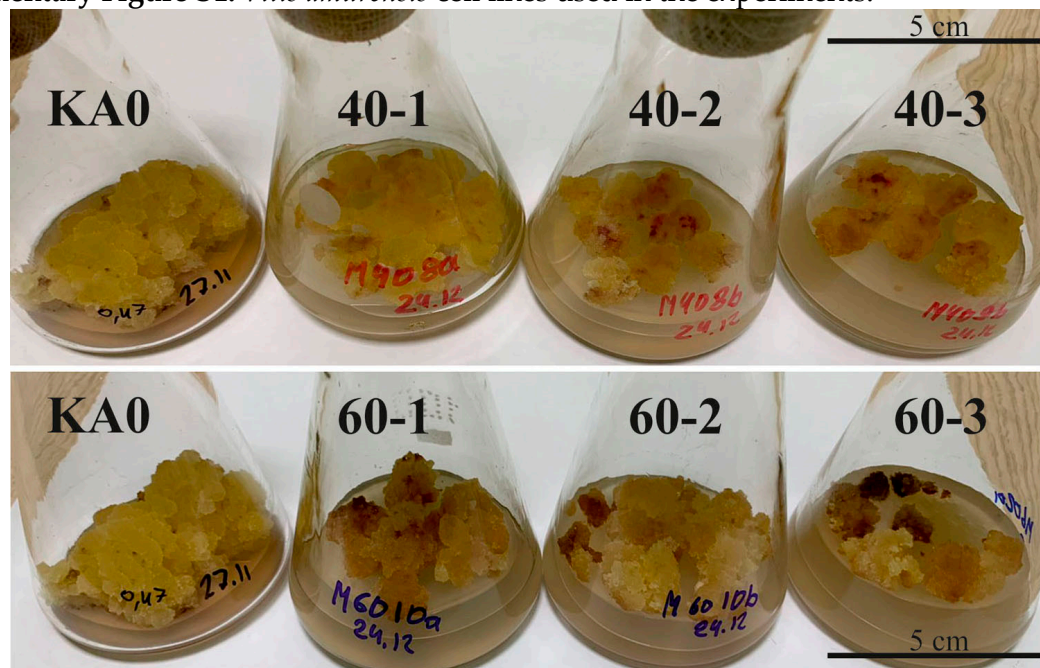

**Supplementary Figure S2.** HPLC chromatograms of anthocyanins in *Vitis amurens* in control KA0 cell culture (A) and cell line 40-1 overexpressed *VaMyb40* gene (detected at 530 nm). Cyanidin-3,5-O-diglucoside (1), delphinidin-3-O-glucoside (2), malvidin-3,5-O-diglucoside (3), cyanidin-3-O-glucoside (4), petunidin-3-galactoside (5).

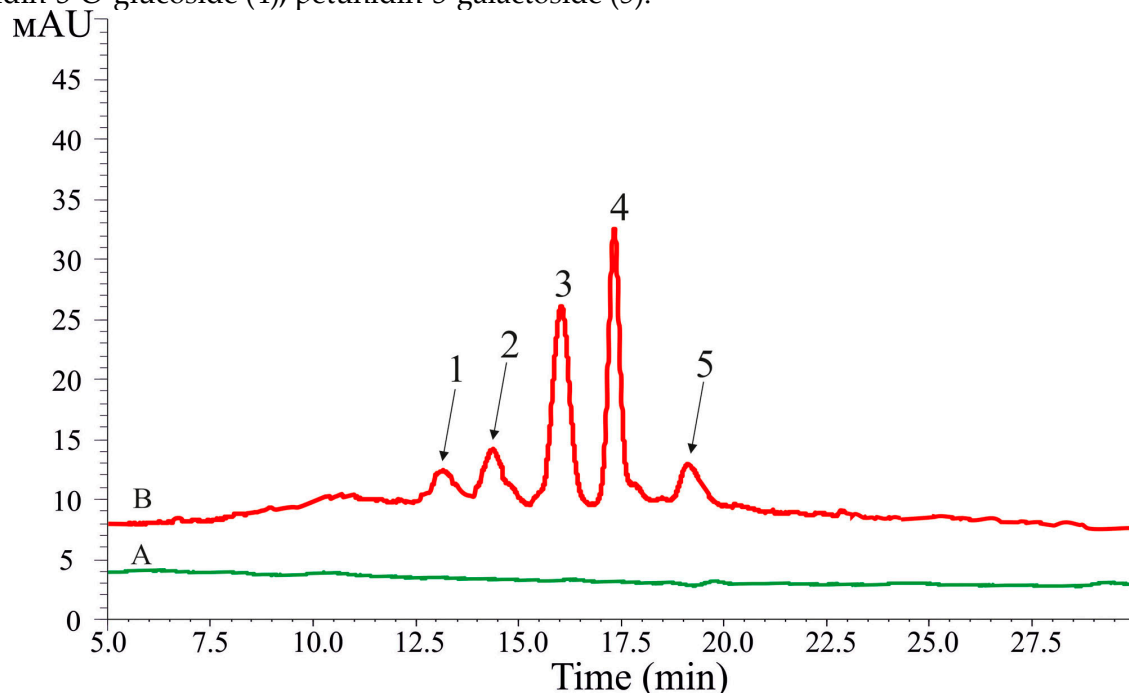

**Supplementary Figure S3.** *VaMyb40*, *VaMyb60*, *VvMyb40*, and *VvMyb60* genes sequences and primer design for PCR analysis. The colors of the primers match the primers shown in the supplementary table S1.

>*VaMyb40* (s1719-1)

ATGGGAAGACAGCCTTGTTGTGACAAGGTTGGGTTGAAGAGAGGTCCATGGACAATTGAGGAAGATCACAACTCAT  
GAGCTTCATCCTCAATAATGGTATCCAATGCTGGAGAATGGTTCCCAAGCTTGCAGGATTGTTGAGATGTGGAAAGAG  
TTGCAGACTAAGATGGATCAATTATCTGAGGCCGATCTTAAGAGGGGCGCACTATCAGAATTGGAAGAGAATCAGA  
TAATCCAACCTTCATTACGTCTTGTTAACAGGTGGTCTAAGATTGCCTCACACTTCCCTGGTCGCACGGATAATGAAAT  
CAAGAACCACTGGAATACACGAATCAAGAAGCGGCTAAAGCAACTGGGGTTAGACCCAGTGACCCACAAACCAATCG



**>VvMyb40 (DEFINITION PREDICTED: *Vitis vinifera* myb-related protein 315-like (LOC109123830), mRNA),**  
**ACCESSION, XM\_019224778**

**>VaMyb60 (s1719-6)**

>VvMyb60 (ACCESSION XM\_034837254, VERSION XM\_034837254.1)

[illegible]



**Supplementary Figure S4.** Proposed model of the signaling pathway leading to stilbene biosynthesis induction and VaMyb40 and VaMyb60 functions in this process in the grapevine cells. Ultraviolet (UV), elicitors, pathogen effectors, and other environmental cues are perceived by specific receptors. Recognition of an external signal leads to sustained calcium influx, activation of calcium sensors, MAPK cascades, which promotes plant hormone signaling and transcription factors (TF) activation including VaMyb40 and VaMyb60. TF activate transcription of the genes responsible for stilbene biosynthesis. CDPK – calcium-dependent protein kinases; CML – calmodulin-like proteins; MAPK – mitogen activated protein kinases; TF - transcription factors.

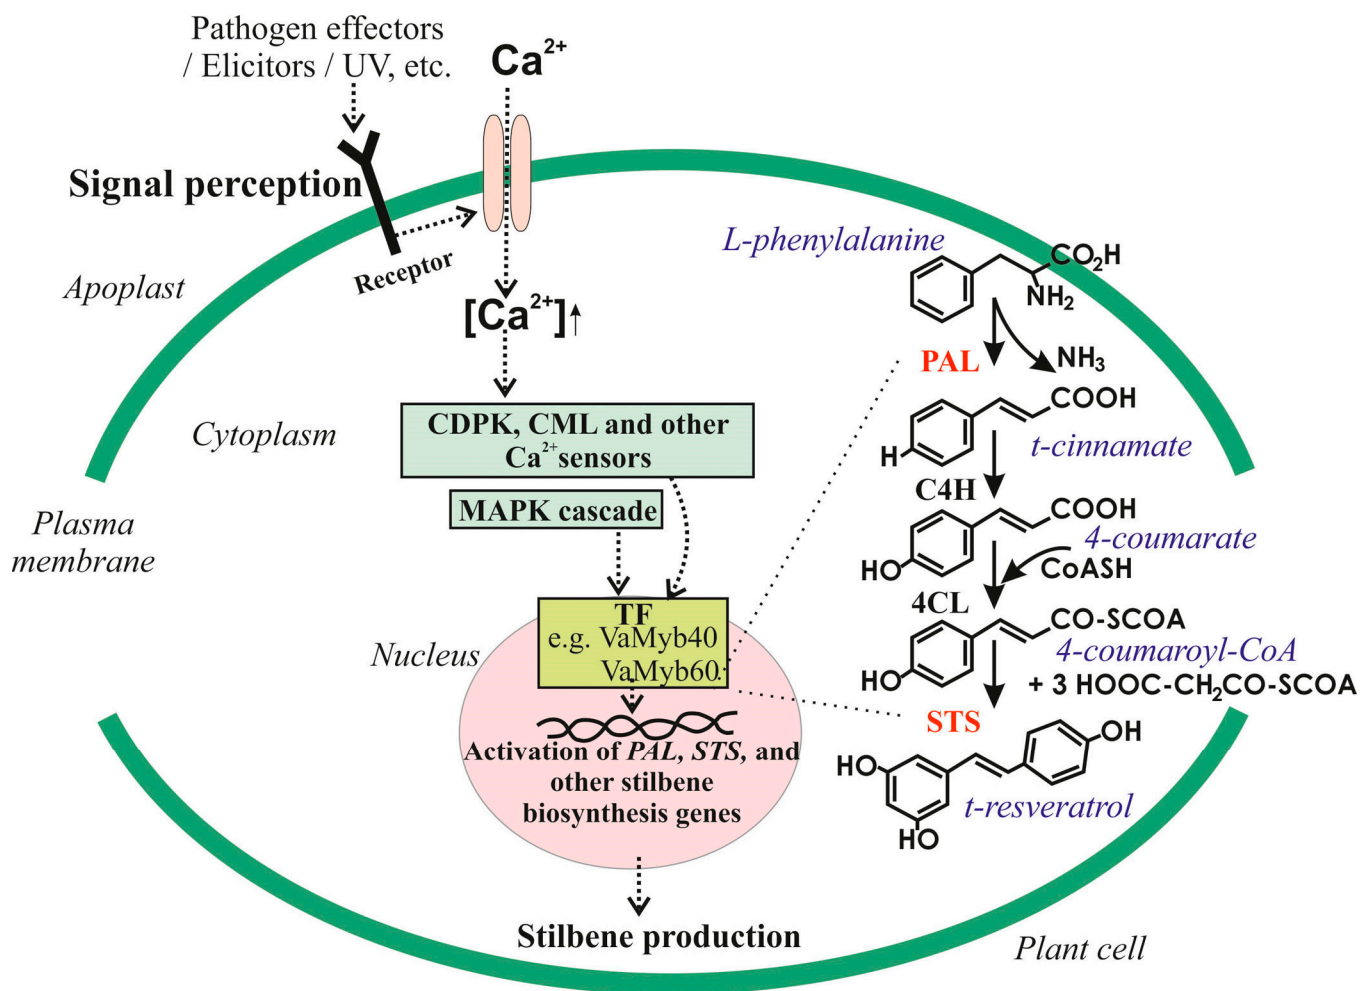

Supplement: s1 [file s1]
